# Supplementary material for: The Role of Mcl-1 in S. aureus-Induced Cytoprotection of Infected Macrophages
Source: Mediators Inflamm. 2013 Jan 28;2013:427021. doi: 10.1155/2013/427021 (PMC3569898; doi:10.1155/2013/427021)
Supplement: Supplementary file 1 — Supplementary Figure1. Clinical and bacteriological examination of S. aureus induced septic arthritis. Supplementary Figure 2. Increased susceptibility to the spontaneous cell death in MCL1 knockdown macrophages infected with S. aureus. Supplementary Figure 3. IL-6 secretion induced by S. aureus in hMDMs. Supplementary Figure 4. NFκB activity induced by S. aureus in hMDMs. [file 427021.f1.zip]

Archive with 3 entries (2 files):
- 427021.f1/
- 427021.f1/description.pdf
- 427021.f1/mat.427021.v2.pptx
